# Supplementary material
Source: PubMed Central journal article supplement (PMC3928167)

## **Supplemental Material to:**

**Alexis Garcia, Yan Feng, Nicola MA Parry, Amanda McCabe, Melissa W Mobley, Kvin Lertpiriyapong, Mark T Whary, and James G Fox**

**Helicobacter pylori infection does not promote hepatocellular cancer in a transgenic mouse model of hepatitis C virus pathogenesis**

**Gut Microbes 2013; 4(6)**

**<http://dx.doi.org/10.4161/gmic.26042>**

**[http://www.landesbioscience.com/journals/gutmicrobes/  
article/26042/](http://www.landesbioscience.com/journals/gutmicrobes/article/26042/)**

Hepatitis index score in the different groups of mice. \*, P≤0.05.

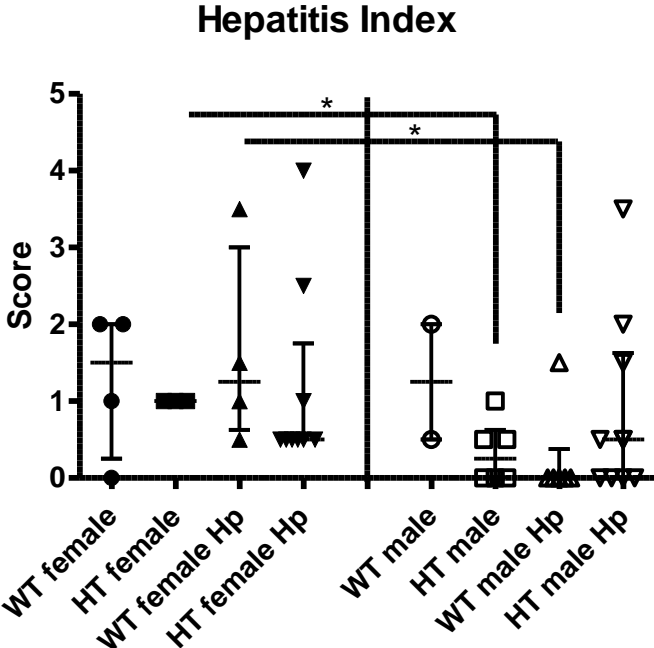

Gene expression analyses. \*,  $P \leq 0.05$ ; \*\*,  $P < 0.01$ .

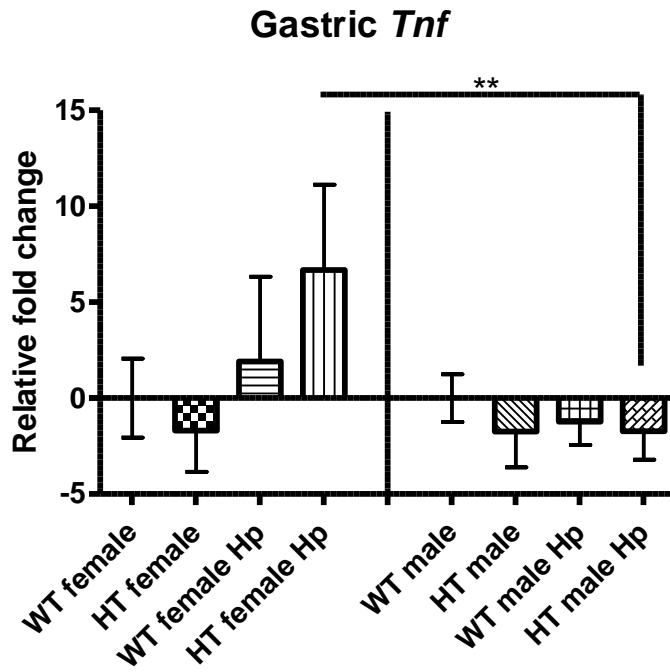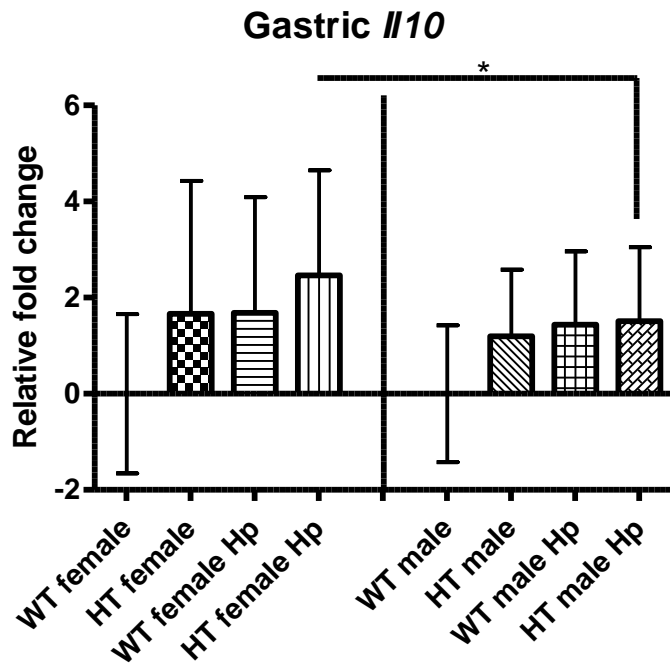

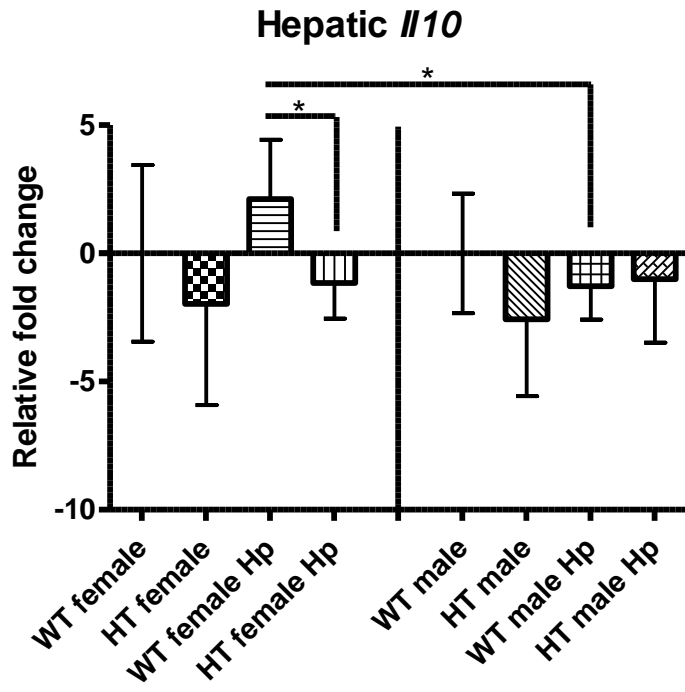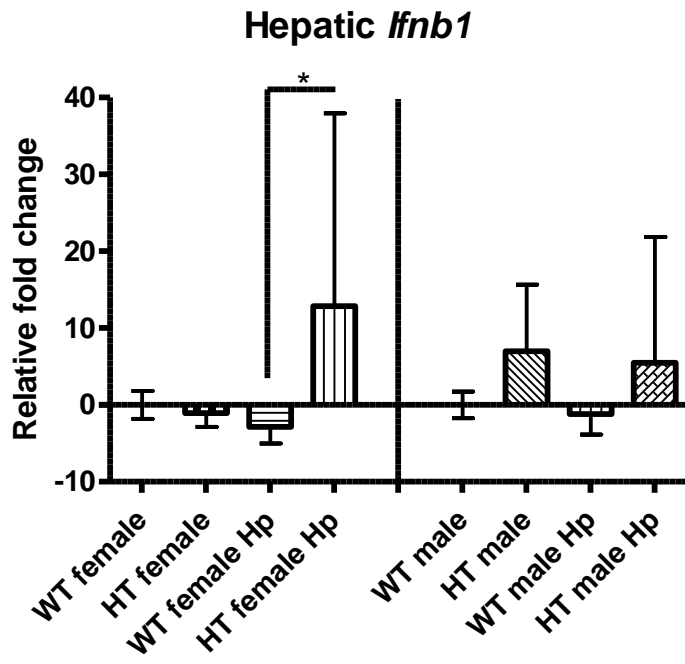

Serum cytokine analyses. \*, P<0.05.

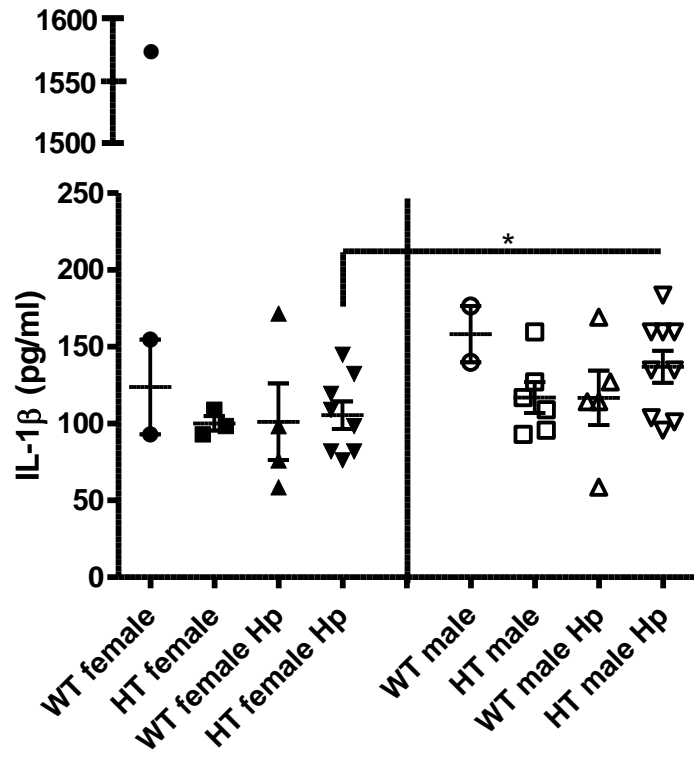

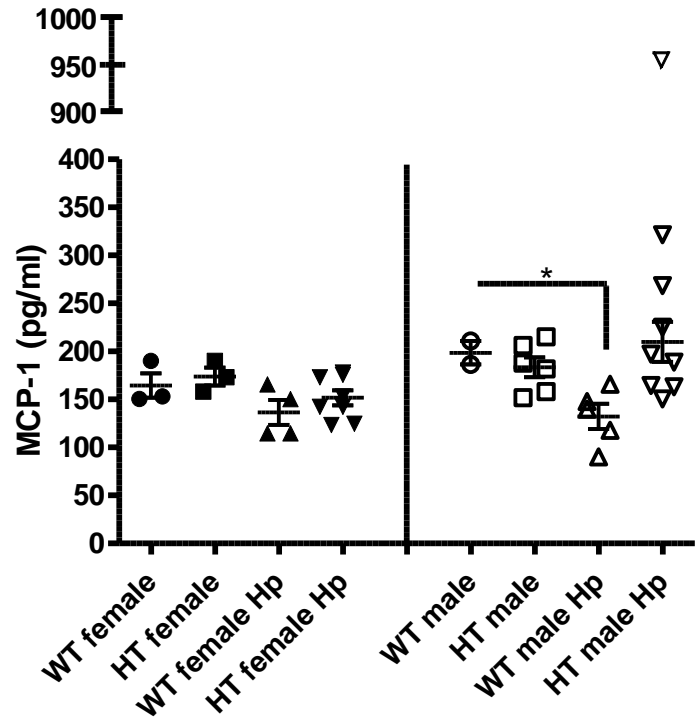

Supplement: gmic-4-577-s01.pdf [file gmic-4-577-s01.pdf]
